# Supplementary material for: Strategies for Improving Sustainability in the Development of High-Performance Styrenic Block Copolymers by Developing Blends with Cellulose Derivatives
Source: MDPI journal article supplement (doi:10.3390/polym16060856), 2024-03-21
Supplement: s1 [file s1]

## Supplementary Materials

# Strategies for Improving Sustainability in the Development of High-Performance Styrenic Block Copolymers by Developing Blends with Cellulose Derivatives

Erika Pajares <sup>1,2</sup>, Josu Fernández Maestu <sup>1</sup>, Irati Fernandez-de-Mendiola <sup>1,3</sup>, Unai Silvan <sup>1,4</sup>, Pedro Costa <sup>5</sup>, Iker Agirrezabal-Telleria <sup>2</sup>, Carmen R. Tubio <sup>1,\*</sup>, Sergio Corona-Galván <sup>6</sup> and Senentxu Lanceros-Mendez <sup>1,4,5</sup>

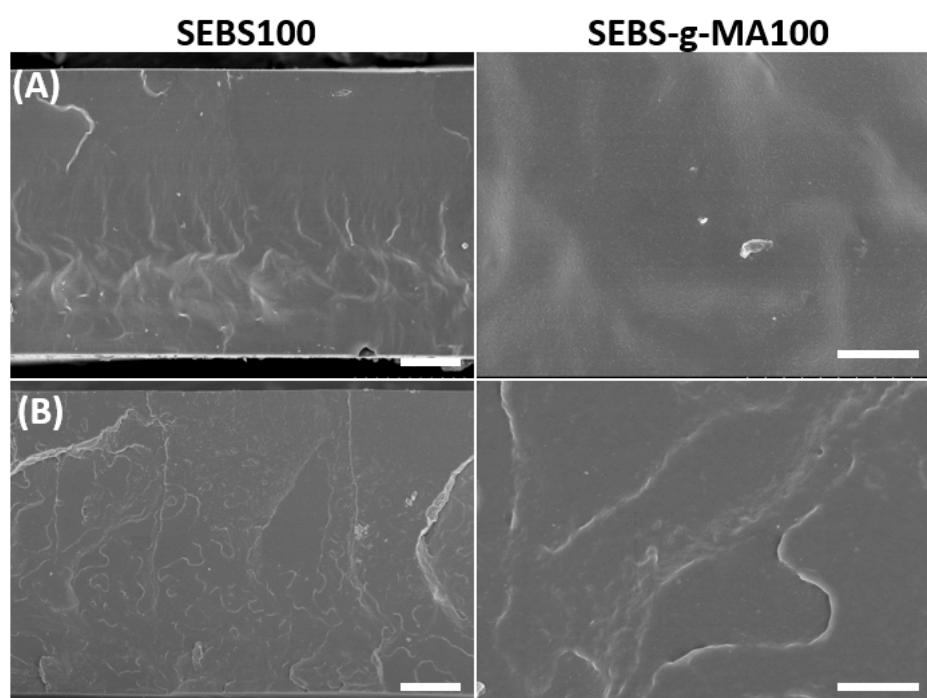

**Figure S1.** Cross-sectional SEM images of SEBS and SEBS-g-MA samples at low magnification (left, 30  $\mu\text{m}$  scale bar) and high magnification (right, 5  $\mu\text{m}$  scale bar).

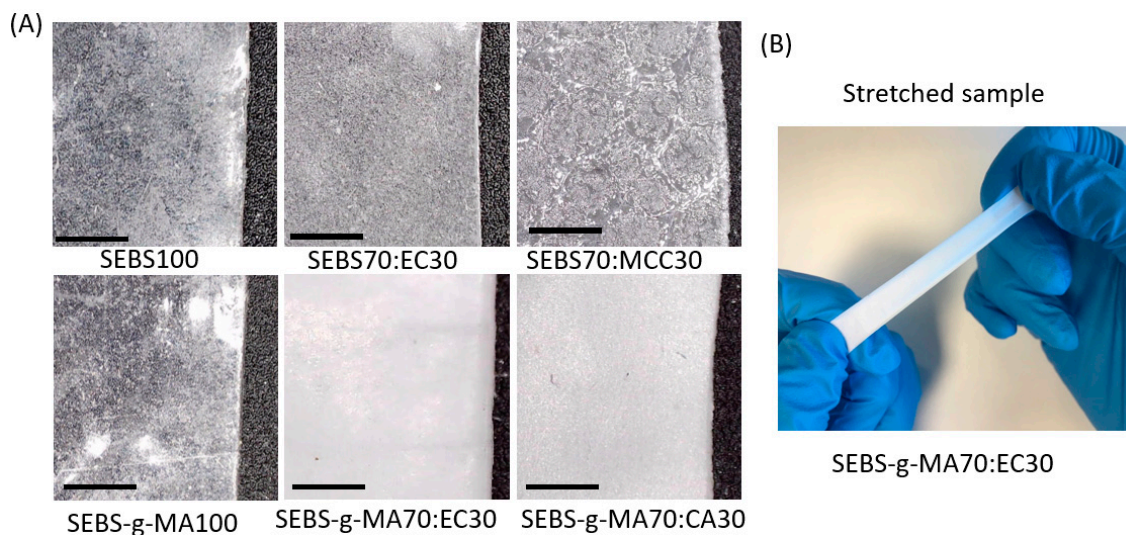

**Figure S2.** (A) Optical microscopy images for the SEBS and SEBS-g-MA based blend films with different cellulose derivatives. Scale bar: 500  $\mu\text{m}$ . (B) Photograph of stretchable SEBS-g-MA70:EC30 blend film.

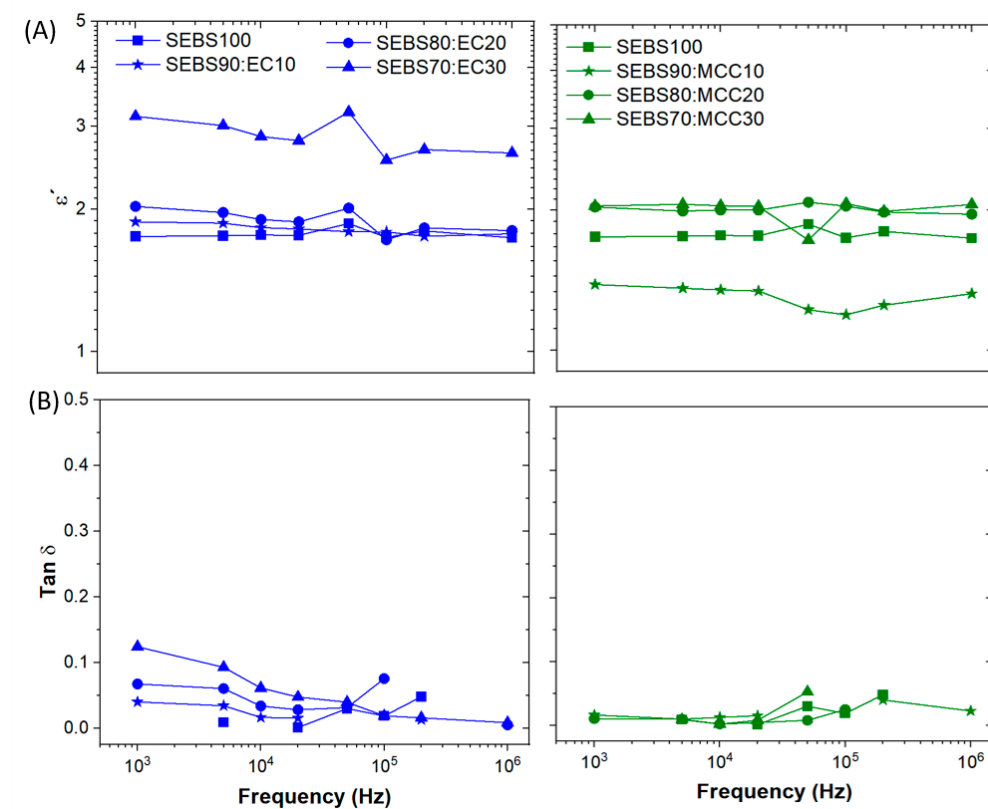

**Figure S3.** (A) Dielectric permittivity, and (B) dielectric loss as a function of frequency for SEBS based blends with EC and MCC fillers.

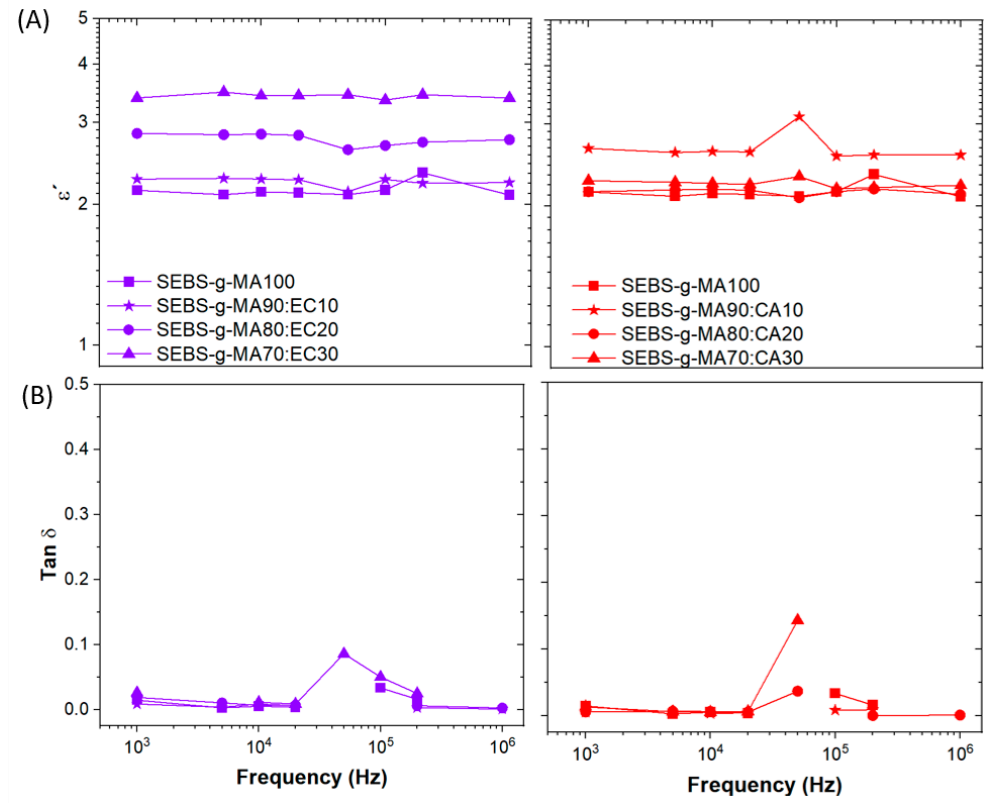

**Figure S4.** (A) Dielectric permittivity, and (B) dielectric loss as a function of frequency for SEBS-g-MA based blends with EC and CA fillers.
